# Supplementary material for: Light-activated carbon dot nanozyme with scandium for a highly efficient and pH-universal bio-nanozyme cascade colorimetric assay
Source: Royal Society of Chemistry journal article supplement (doi:10.1039/d3tb00927k), 2023-01-01
Supplement: d3tb00927k1.pdf [file d3tb00927k1.pdf]

1 Electronic Supplementary Information

2 **Light-activated Carbon Dots Nanozyme with Scandium for Highly**  
3 **Efficient and pH-Universal Bio-Nanozyme Cascade Colorimetric**  
4 **Assay**

5 *Xueshan Chen<sup>a</sup>, Yao Lin<sup>b</sup>, Jing Liao<sup>c</sup>, Jinyi Zhang<sup>a,\*</sup>, Chengbin Zheng<sup>a,\*</sup>*

6

7 *<sup>a</sup>Key Laboratory of Green Chemistry & Technology of MOE, College of Chemistry,*  
8 *Sichuan University, Chengdu, Sichuan 610065, China*

9 *<sup>b</sup>West China School of Basic Medical Sciences & Forensic Medicine, Sichuan*  
10 *University, Chengdu 610041, China*

11 *<sup>c</sup>College of Chemistry and Material Science, Sichuan Normal University, Chengdu,*  
12 *Sichuan 610068, China*

13

14 \*Corresponding author:

15 Fax: +86 28 85412356; Phone: +86-28-85416446

16 E-mails: abinscu@scu.edu.cn (C. Zheng); jinyizhang@scu.edu.cn (J. Zhang)

17

18

## 1 Reagents and Materials.

2 Citric acid monohydrate, ascorbic acid (AA), 3,3',5,5'-Tetramethylbenzidine (TMB),  
3 scandium chloride hexahydrate ( $\text{ScCl}_3 \cdot 6\text{H}_2\text{O}$ ), cerium chloride heptahydrate ( $\text{CeCl}_3 \cdot 7\text{H}_2\text{O}$ ),  
4 vanadium chloride ( $\text{VCl}_3$ ), chromium trichloride ( $\text{CrCl}_3$ ), manganese chloride ( $\text{MnCl}_2$ ), iron  
5 chloride ( $\text{FeCl}_3$ ), cobalt chloride ( $\text{CoCl}_2$ ), nickel chloride ( $\text{NiCl}_2$ ), copric chloride dihydrate  
6 ( $\text{CuCl}_2 \cdot 2\text{H}_2\text{O}$ ), zinc chloride ( $\text{ZnCl}_2$ ), dichlorvos standard (DDV), parathion-methyl solution  
7 (PM), profenofos (PF), Glucose oxidase (GOx), Lysozyme, Trypsin,  $\gamma$ -Globulins,  
8 sulfamethoxazole, amoxicilin and penicillin were obtained from Aladdin (Shanghai, China).  
9 Tris(hydroxymethyl)aminomethane was obtained from Damas-beta (Shanghai, China).  
10 Superoxide dismutase bovine, acetonitrile-d<sub>3</sub> (99.8 atom %D), deuterium oxide (D, 99.9%) ,  
11 Pepsin, Papain, Protamine and Bovine serum albumin (BSA) were obtained from  
12 Sigma-Aldrich (Shanghai, China). Mannite, tryptophan, catalase, acetylcholine (ACh),  
13 acetylcholinesterase (AChE), sodium L-ascorbyl-2-phosphate (AA2P), and alkaline  
14 phosphatase (ALP) were obtained from Yuanye Biotechnology Co. Ltd. (Shanghai, China).  
15 Hydrochloric acid, ethylenediamine, acetic acid, sodium acetate, sodium hydroxide, dimethyl  
16 sulfoxide (DMSO), and methanol were obtained from Kelong Reagent Co. (Chengdu, China).  
17 Column chromatography silica (300–400 mesh) was obtained from Jiangyou Co. (Shandong,  
18 China). All chemicals were of analytical grade, OPs were dissolved in methanol originally and  
19 the Milli-Q water (18.2 M $\Omega$ ·cm) was used for all of these experimental solutions. The  
20 concentration of C-dots in this work was 10  $\mu\text{g}/\text{mL}$ . The wavelength of LED light used in all  
21 experiments was 365 nm (3 V, 3 W, XP-3535, Kiwi Optoelectronics Co. Shenzhen).

## 22 Instruments.

23 The absorption spectra were collected by using a UV-Vis spectrophotometer  
24 (PerkinElmer Lambda365). The fluorescence spectra were obtained with FluoroMax-4  
25 spectrofluorometer (Horiba Jobin Yvon). The FT-IR spectra (KBr pellets) was taken on a  
26 Nicolet IS50 Fourier transform infrared spectrometer (ThermoFisher Inc.). The  
27 phosphorescence spectra of singlet oxygen were carried out using a Fluorolog-3  
28 spectrofluorometer (Horiba Jobin Yvon) with a Near-Infrared detector. The fluorescence  
29 lifetimes were measured on a Fluorolog-3 spectrofluorometer (Horiba Jobin Yvon) with  
30 DeltaDiode (Ex: 405 nm) as the excitation source and a picosecond photon detection module  
31 (PPD-850, Horiba Jobin Yvon) as the detector, respectively. Zeta-potential was get using  
32 particle size analyzer ZEN3690 (Malvern Instruments Ltd.). All pH values were obtained with  
33 a pH meter (FiveEasy plus, METTLER TOLEDO) with a combined glass–calomel electrode. The  
34 absorbance spectra at 650 nm were recorded by a microplate reader BioTek Instrument Co.  
35 Ltd. (H1M). The mass concentration of C-dots was obtained with a freeze dryer  
36 (Scientz-10N/A). Transmission electron microscopy (TEM) images of C-dots was obtained  
37 using a Tecnai G2 F20 S-TWIN transmission electron microscope at an accelerating voltage of  
38 200 kV (FEI Co., USA).

39

40

## 1 **Synthesis of Photooxidation C-dots.**

2 UV-responsive photooxidation C-dots were synthesized by the common hydrothermal  
3 method.<sup>1</sup> Specifically, ethylenediamine (335  $\mu$ L) and citric acid monohydrate (1.15 g) were  
4 dissolved in Milli-Q water (10 mL), and then transferred the mixed solution into a  
5 polytetrafluoroethylene (Teflon)-lined autoclave (20 mL) and heated to 240°C for 5 h. After  
6 complete carbonization and cooling to room temperature, purification was carried out by  
7 using column chromatography silica (300 ~ 400 mesh) to get water-soluble homogeneous  
8 C-dots (water as the eluent). Eventually, C-dots powder was obtained by freezing-drying  
9 calculated concentration was 10 mg/mL (original concentration).

## 10 **Interactions between C-dots and Sc<sup>3+</sup>.**

11 The UV-vis absorption spectra, fluorescence spectra, and fluorescence lifetimes of  
12 C-dots, C-dots with Sc<sup>3+</sup> (1 mM or 5 mM) were obtained at pH = 4.5. C-dots with 1 mM Sc<sup>3+</sup> in  
13 a CD<sub>3</sub>CN-D<sub>2</sub>O mixed solvent (v/v = 15:1) were prepared to get phosphorescence emission  
14 spectra of <sup>1</sup>O<sub>2</sub> produced by the photosensitization reaction (pH = 7.0 buffer solution). The  
15 zeta potential was determined in the presence and absence of Sc<sup>3+</sup>. The absorption spectra  
16 of pre-light and post-oxidation of TMB were carried out at pH = 4, which meant after 100 s of  
17 C-dots/Sc<sup>3+</sup> irradiation, the light was switched off and TMB was added immediately. To  
18 examine the need for C-dots and Sc<sup>3+</sup> incubation, pH = 4.0, 7.0 and 10.0 were chosen as  
19 representatives, and the above concentration of C-dots and Sc<sup>3+</sup> were incubated for 0, 15, 30,  
20 120, 360, 600 minutes, respectively. The 1 mM Sc<sup>3+</sup>, V<sup>3+</sup>, Cr<sup>3+</sup>, Mn<sup>2+</sup>, Fe<sup>3+</sup>, Co<sup>2+</sup>, Ni<sup>2+</sup>, Cu<sup>2+</sup>, Zn<sup>2+</sup>  
21 were added to 10 mM pH 7.0 buffer solution to explore the complexation ability among  
22 transition metal ions.

## 23 **Sensing selectivity of ALP, AchE and Ops based on C-dots/Sc<sup>3+</sup> photocatalytic 24 oxidation system.**

25 The GOx, Lysozyme, Trypsin,  $\gamma$ -Globulins, Pepsin, Papain, Protamine and BSA were  
26 utilized to examine the selectivity of the enzyme-nanozyme cascade reaction for sensing ALP  
27 and AchE when ATCh and AA2P as substrate, respectively. The concentration of ALP and  
28 AchE were 30 U/L and 10 U/L, respectively. The final concentration of other proteins were 20  
29  $\mu$ g/mL. Three kinds of OPs including dichlorvos (DDV), parathion-methyl (PM), profenofos (PF)  
30 and three kinds antibiotics including sulfamethoxazole, amoxicilin, penicillin were examined  
31 for studying the determination selectivity of OPs upon inhibitors-induced competition  
32 reaction of photocatalytic oxidation enzyme-nanozyme cascade.

33

34

35

36

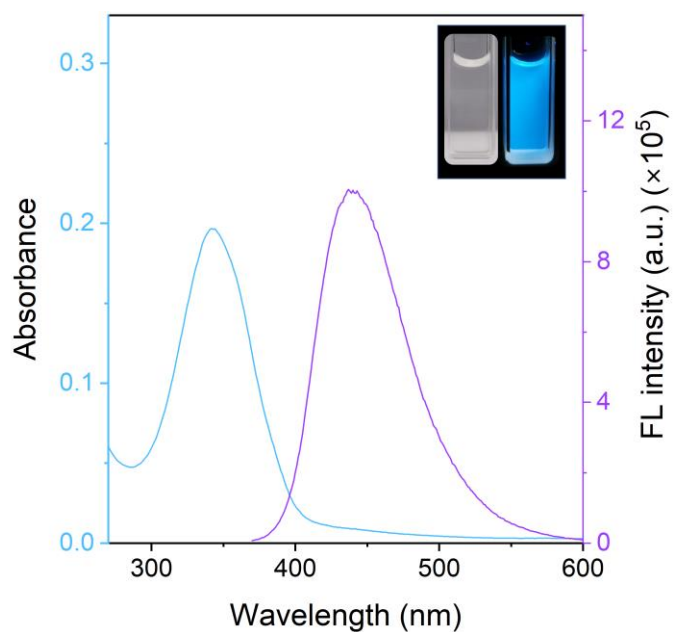

1  
 2 **Fig. S1.** The absorbance and fluorescence spectra (Ex: 365 nm) of C-dots (10  $\mu\text{g}/\text{mL}$ ) (in UP water) in  
 3 this work. The inset are the photographs of C-dots solution in natural light (left) and 365 nm UV-light  
 4 excitation (right).

5

6

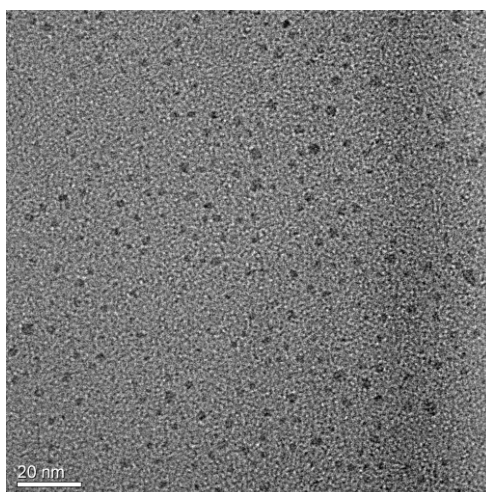

7

8 **Fig. S2.** TEM micrograph of synthesized C-dots in this work. The C-dots have a homogeneous  
 9 dispersion with no significant aggregation and particle diameters of  $\sim 2$  nm.

10

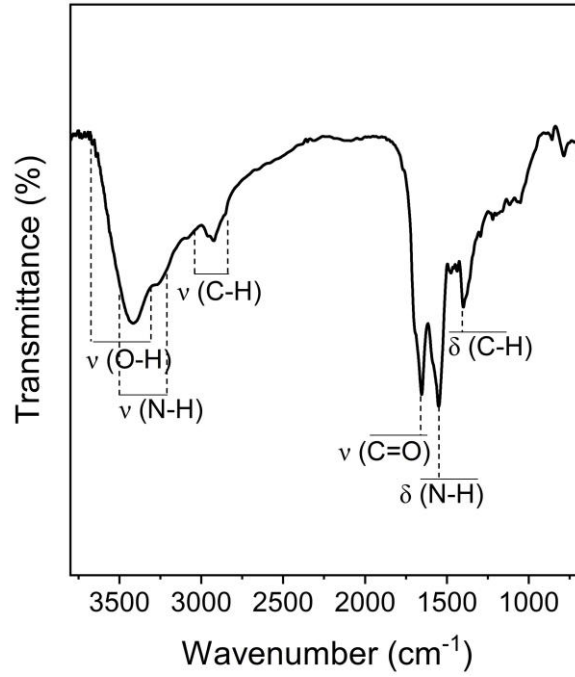

1

2 **Fig. S3.** FTIR spectra of C-dots. It mainly contains -OH, -C=O, NH, and CH groups.

3

4

5

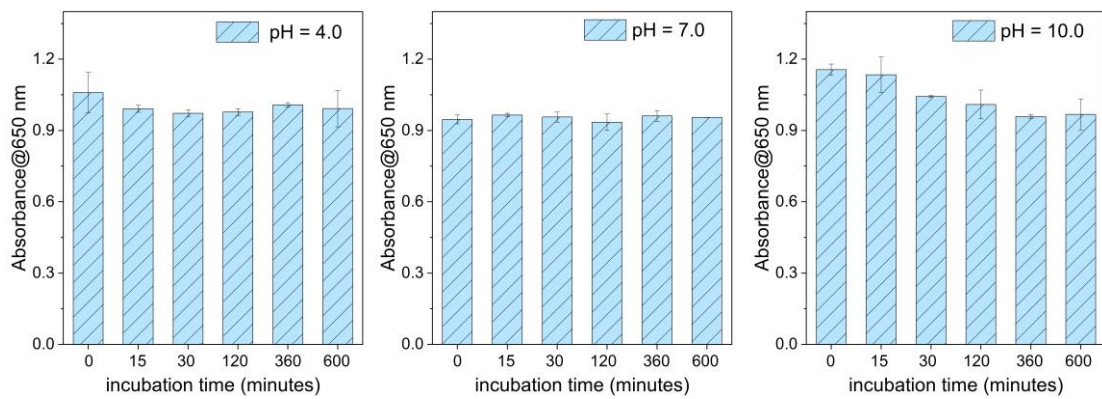

6

7 **Fig. S4.** The incubation time of  $\text{Sc}^{3+}$  and C-dots at pH = 4.0, 7.0, and 10.0, respectively. (1 mM  $\text{Sc}^{3+}$  for  
8 pH 4.0-7.0, 5 mM  $\text{Sc}^{3+}$  for pH 10.0)

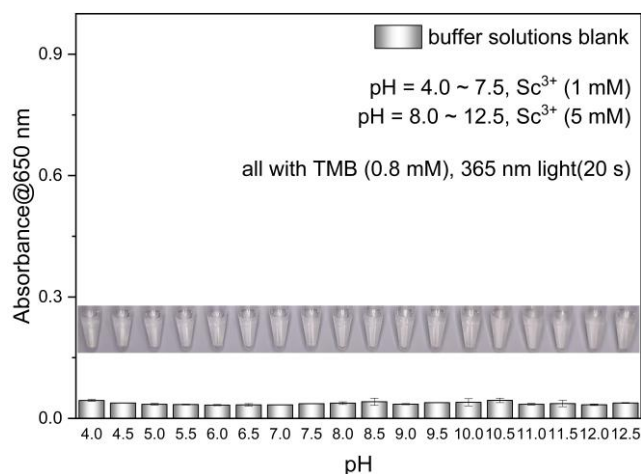

1

2 **Fig. S5.** Absorbance@650 nm of TMB (0.8 mM) oxidation when only buffer solutions exist at broad pH  
 3 ranges, the inset are corresponding photographs. (pH 4.0–7.5: 10 mM NaAc-HAc buffer, pH 8.0 ~ 10.5:  
 4 10 mM Tris-HCl buffer, pH 11.0–12.5: NaOH solution.)

5

6

7

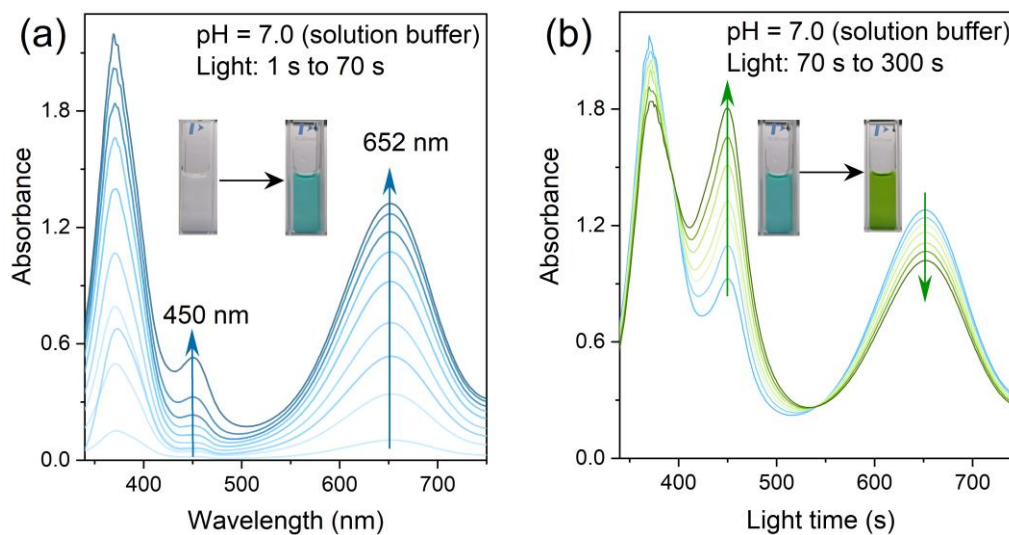

8

9 **Fig. S6.** (a) The absorption spectra of oxTMB with 1 s ~ 70 s irradiation time. (b) The absorption  
 10 spectra of oxTMB with 90 s ~ 300 s irradiation time (TMB: 0.1 mM).

11

12

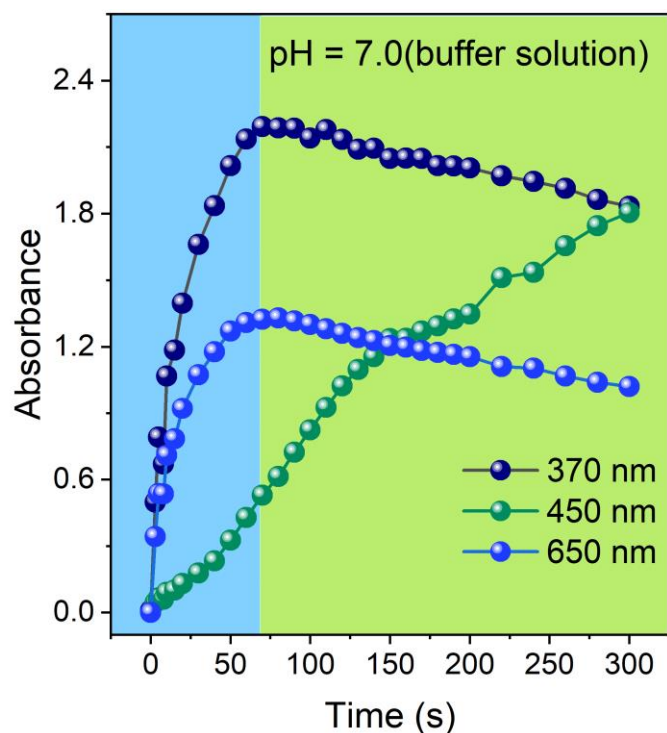

1

2 **Fig. S7.** Kinetics of TMB (0.1 mM) photooxidation monitored at 370 nm, 450 nm and 650 nm in the  
 3 presence of the C-dots (10 µg/mL) and Sc<sup>3+</sup> (1 mM) at pH = 7.0 buffer solution.

4

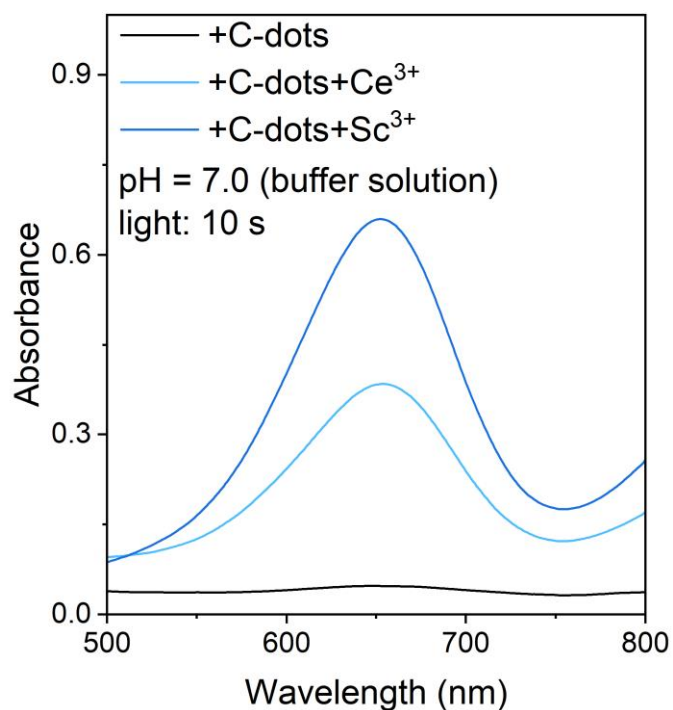

5

6 **Fig. S8.** Compare the TMB oxidation degree of C-dots, C-dots + Sc<sup>3+</sup> (1 mM), and C-dots + Ce<sup>3+</sup> (1 mM).  
 7 All in pH = 7.0 Tris-HCl buffer (10 mM) solution, and light for 10 s.

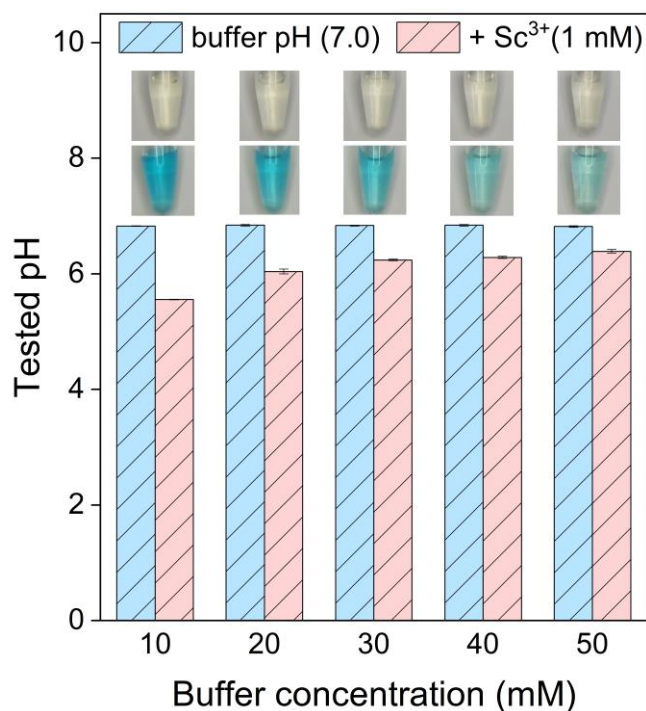

1

2 **Fig. S9.** The actual pH values of different final concentration buffer solution when added with 1 mM  
 3 Sc<sup>3+</sup>. The insets are photographs of photocatalytic oxTMB under different buffer solutions in the  
 4 presence (bottom) and absence (top) of Sc<sup>3+</sup>.

5

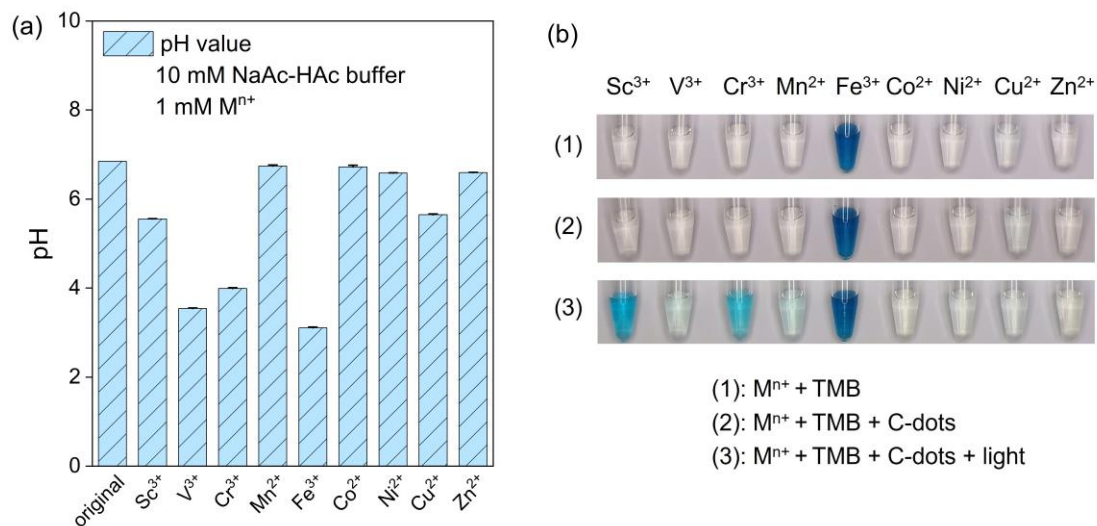

6

7 **Fig. S10.** (a) The actual pH values when added with 1 mM different transition metal ions. (b) The  
 8 photographs of TMB oxidation at three varied condition. (10 mM NaAc-HAc buffer solution, TMB: 0.8  
 9 mM, C-dots: 10 µg/mL, light: 20 s)



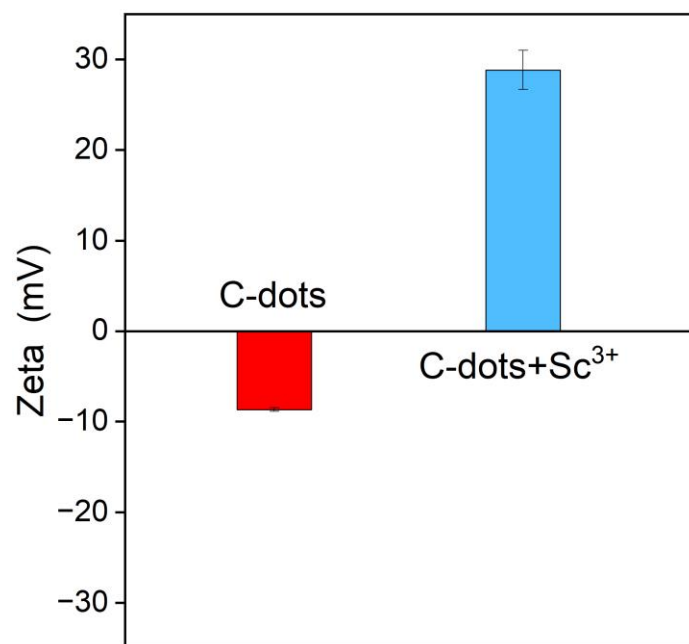

1  
 2 **Fig. S11.** The zeta-potential change of C-dots (10  $\mu\text{g/mL}$ ) in the presence and absence of  $\text{Sc}^{3+}$  (1 mM)  
 3 in UP water.

4

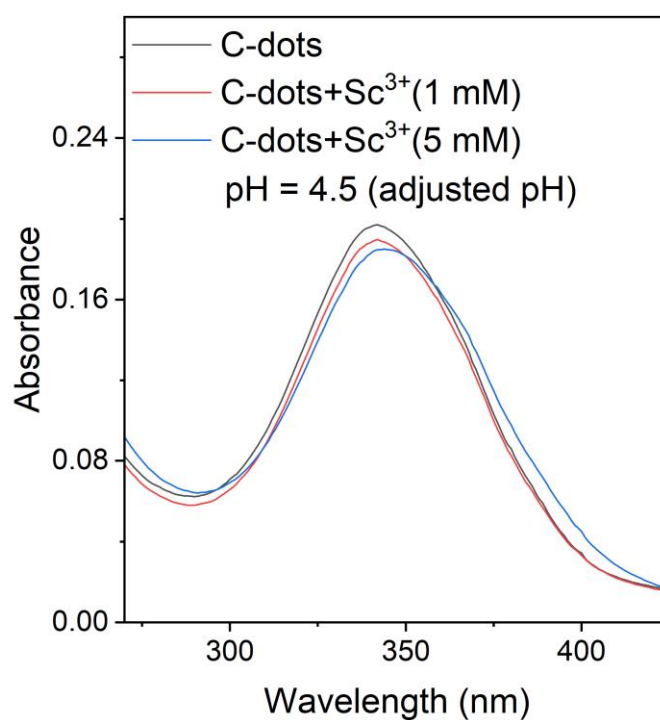

5  
 6 **Fig. S12.** Absorption spectra of C-dots (10  $\mu\text{g/mL}$ ) in the presence and absence of  $\text{Sc}^{3+}$  (1 mM or 5  
 7 mM), respectively. (All groups are adjusted to same pH condition, pH = 4.5).

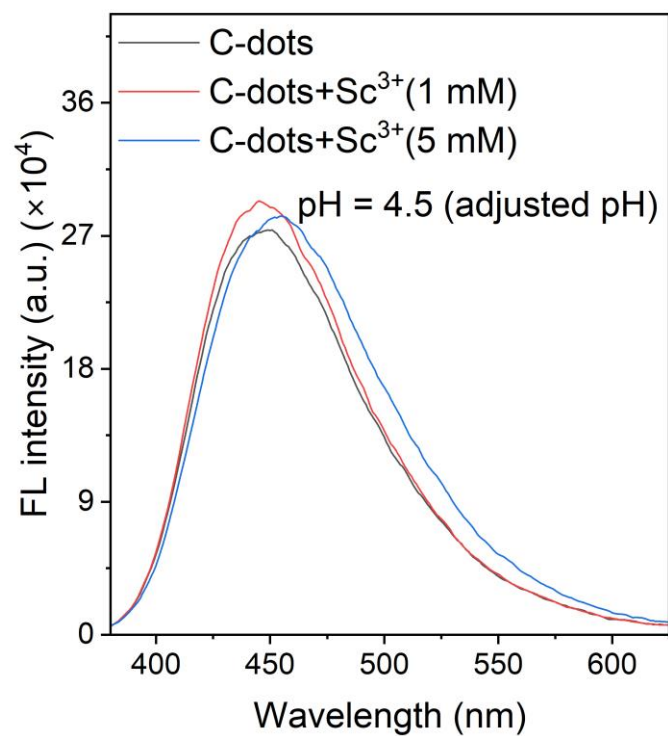

1

2 **Fig. S13.** Fluorescence spectra of C-dots (10  $\mu\text{g}/\text{mL}$ ) in the presence and absence of  $\text{Sc}^{3+}$  (1 mM or 5  
3 mM), respectively. (All groups are adjusted to same pH condition, pH = 4.5)

4

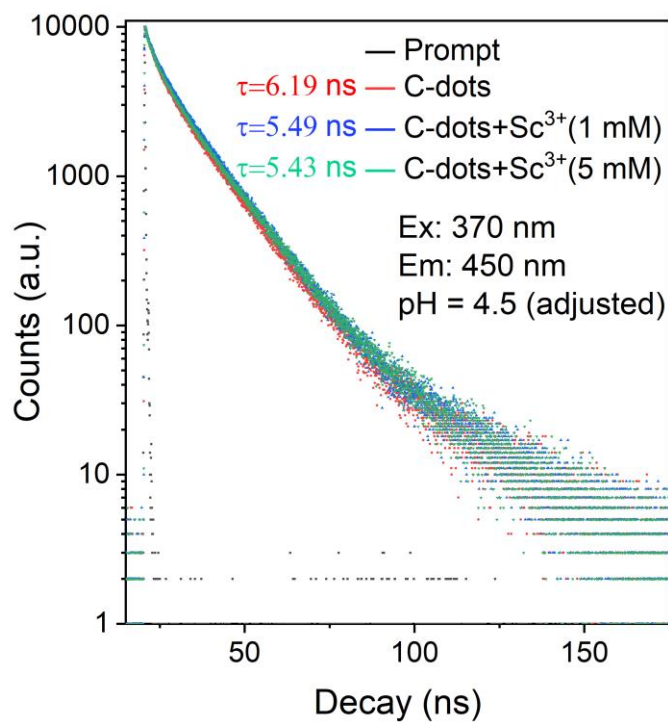

5

6 **Fig. S14.** Fluorescence lifetime of C-dots (10  $\mu\text{g}/\text{mL}$ ) in the presence and absence of  $\text{Sc}^{3+}$  (1 mM or 5  
7 mM), respectively. (All groups are adjusted to same pH condition, pH = 5.5)

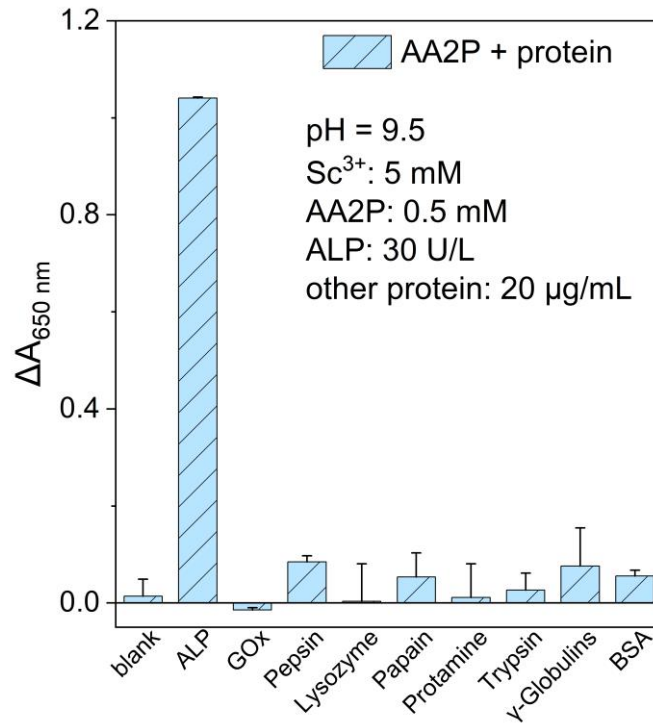

1

2 **Fig. S15.** ΔA of TMB photocatalytic oxidation when substrate AA2P with different types of proteins. (10  
 3 μg/mL C-dots, 0.8 mM TMB, light 20 s)

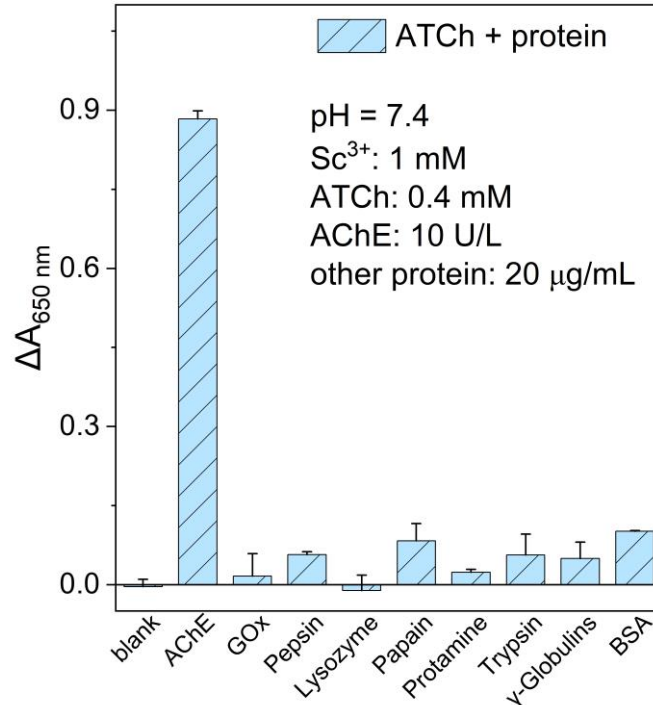

4

5 **Fig. S16.** ΔA of TMB photocatalytic oxidation when substrate ATCh with different types of proteins. (10  
 6 μg/mL C-dots, 0.8 mM TMB, light 20 s)

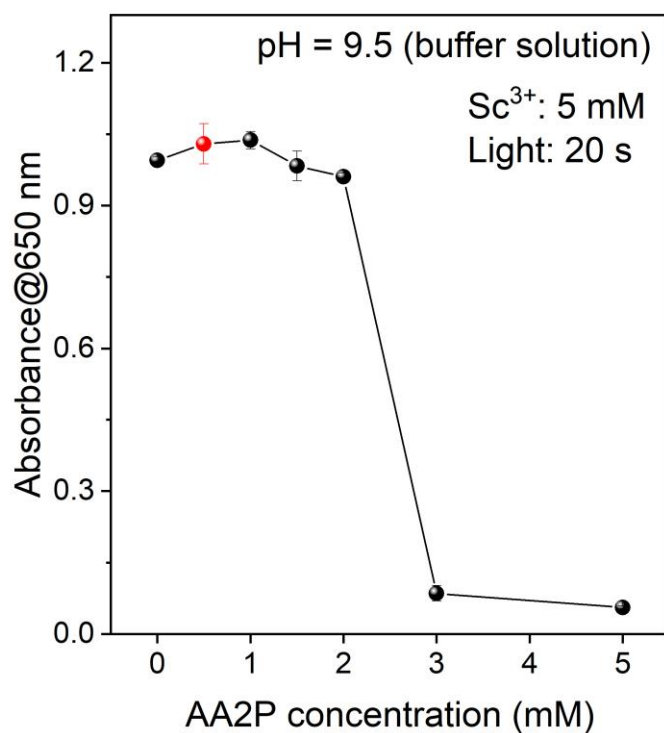

1

2 **Fig. S17.** Optimization of AA2P concentration. (pH = 9.5 buffer solution, 5 mM  $Sc^{3+}$ , 10  $\mu$ g/mL C-dots,  
 3 0.8 mM TMB, light 20 s)

4

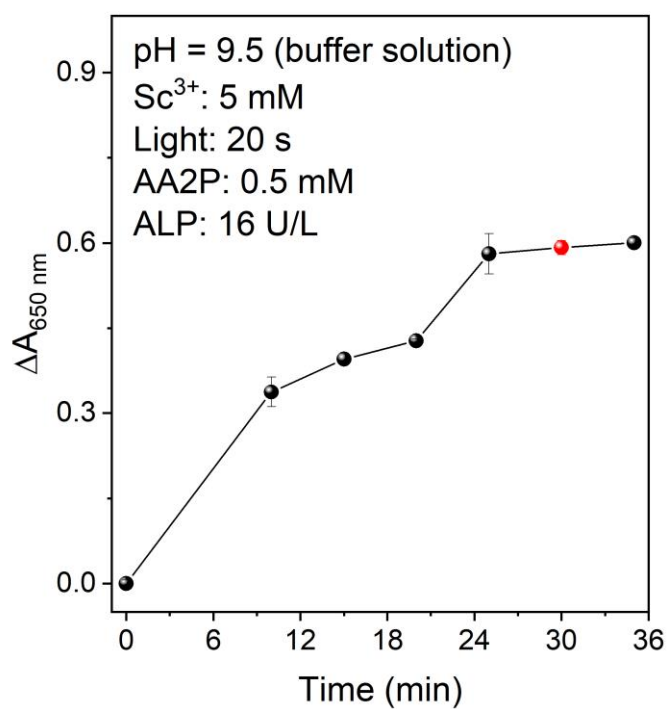

5

6 **Fig. S18.** Optimization of the bathing time of ALP and AA2P at 37°C. (pH = 9.5 buffer solution, 5 mM  
 7  $Sc^{3+}$ , 10  $\mu$ g/mL C-dots, 0.8 mM TMB, light 20 s, 0.05 mM AA2P, 16 U/L ALP)

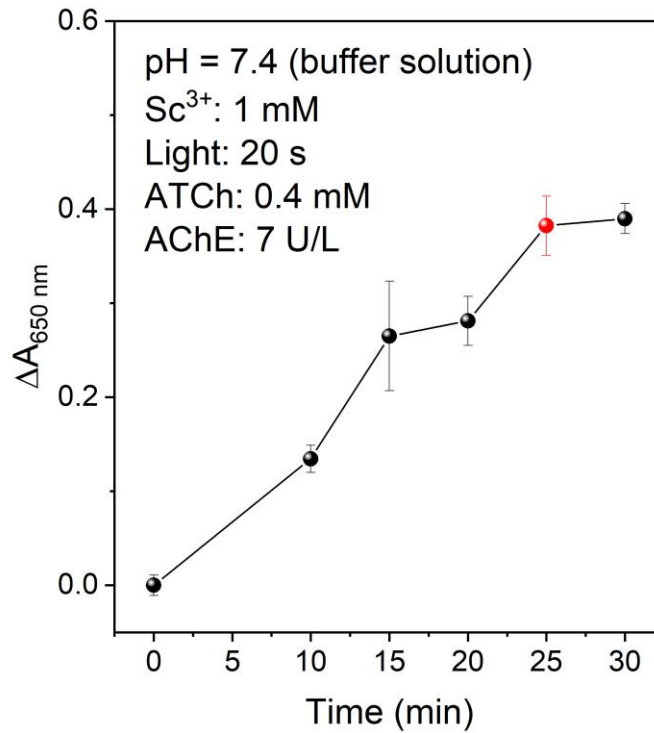

1

2 **Fig. S19.** Optimization of the bathing time of ATCh and AChE at 37 °C. (pH = 7.4 buffer solution, 1 mM  
 3  $\text{Sc}^{3+}$ , 10  $\mu\text{g}/\text{mL}$  C-dots, 0.8 mM TMB, light 20 s, 0.4 mM ATCh, 7 U/L AChE)

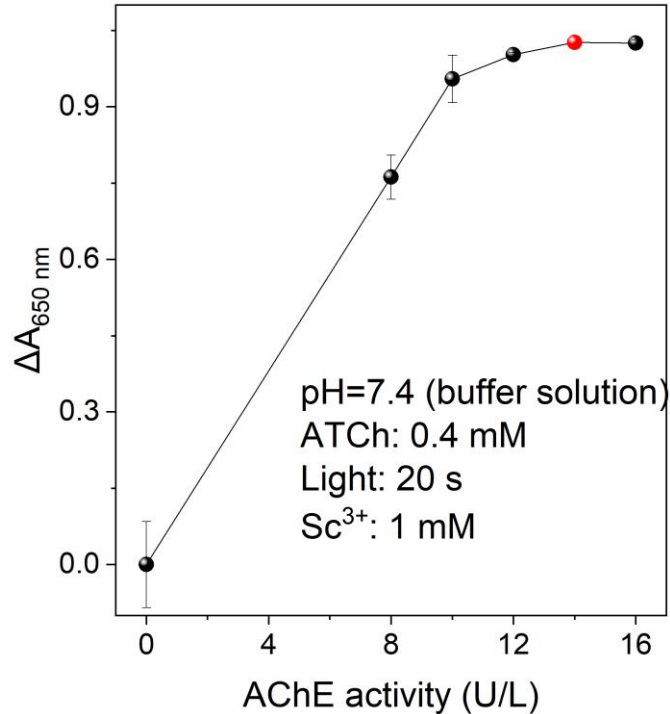

4

5 **Fig. S20.** Optimization of the activity of AChE reacted with OP. (pH = 7.4 buffer solution, 1 mM  $\text{Sc}^{3+}$ , 0.8  
 6 mM TMB, light 20 s, 0.4 mM ATCh, 3  $\mu\text{M}$  DDV as OP model)

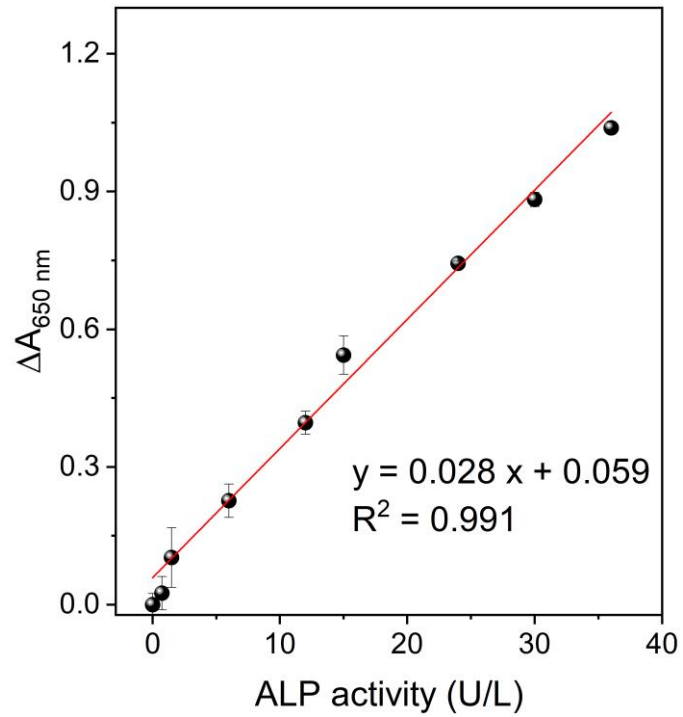

1

2 **Fig. S21.** Calibration curve for the ALP detection. (pH = 9.5 buffer solution, 5 mM Sc<sup>3+</sup>, 0.8 mM TMB,  
3 light 20 s, 0.5 mM AA2P, ΔA means A<sub>0</sub> - A)

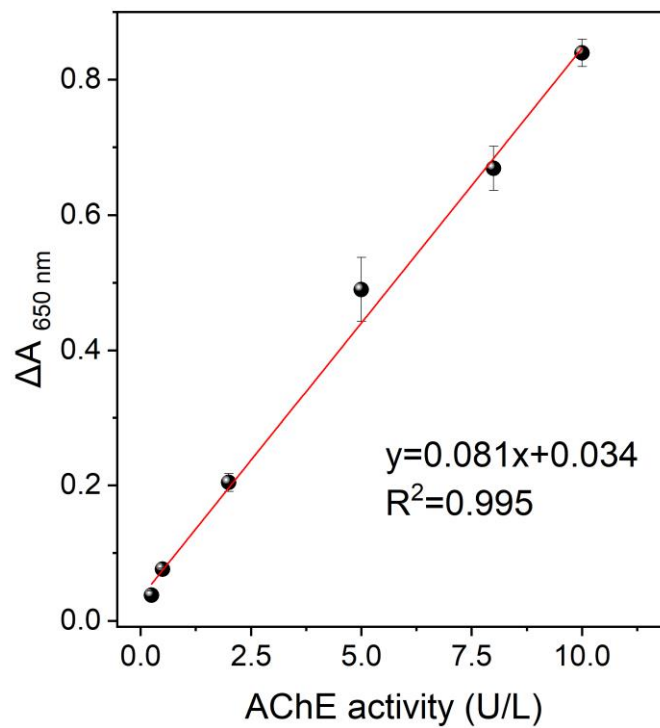

4

5 **Fig. S22.** Calibration curve for the AChE detection. (pH = 7.4 buffer solution, 1 mM Sc<sup>3+</sup>, 0.8 mM TMB,  
6 light 20 s, 0.4 mM ATCh)

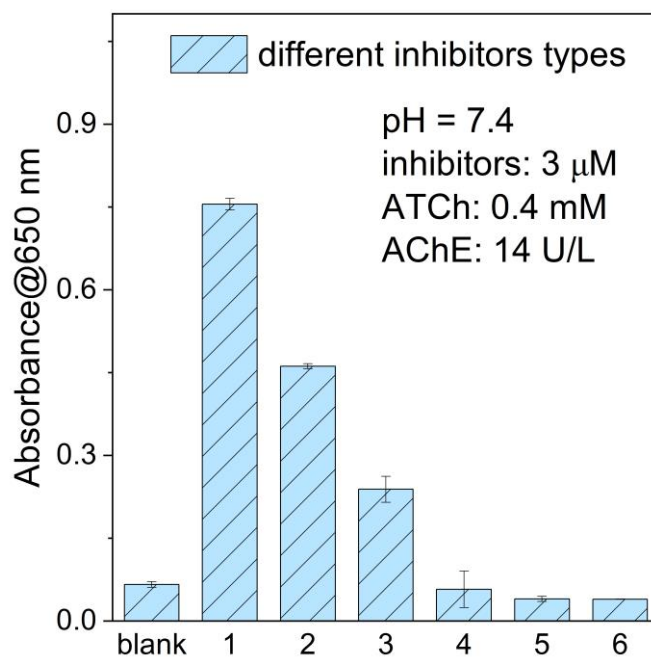

1

2 **Fig. S23.** Absorbance of photocatalytic TMB oxidation when substrate ATCh and AChE enzyme with  
 3 different types of inhibitors (1: DDV, 2: PM, 3: PF, 4: sulfamethoxazole, 5: amoxicilin, 6: penicillin). (10  
 4  $\mu\text{g}/\text{mL}$  C-dots, 0.8 mM TMB, light 20 s)

5

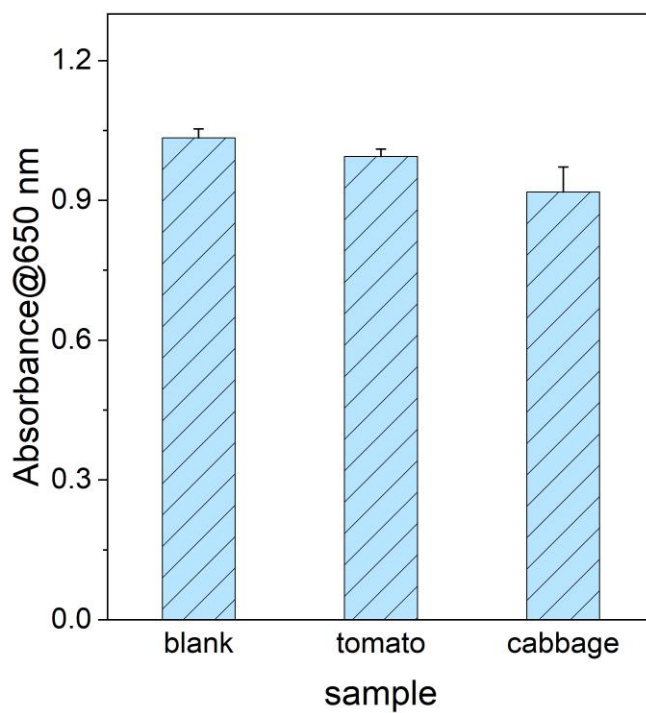

6

7 **Fig. S24.** Compare the influence of tomato and cabbage spraying liquid with blank UP water.

1 **Table S1. Listed the one-pot catalytic cascade colorimetric methods for targets**  
 2 **detection.**

| Expressed signal                         | Analyte         | pH         | Time (min) | Linear range                            | LOD                   | Ref.        |
|------------------------------------------|-----------------|------------|------------|-----------------------------------------|-----------------------|-------------|
| AuNCs@ZIF-8                              | OPs             | 7.4 → 4.0  | 60 + 15    | 0.8 ~ 10 <sup>5</sup> ng/mL             | 0.4 ng/mL             | 2           |
| H <sub>2</sub> O <sub>2</sub> /TMB       | OPs             | 7.4 → 5.0  | 30 + 20    | 10 ~ 10 <sup>3</sup> ng/mL              | 4 ng/mL               | 3           |
|                                          | AChE            |            | 20         | 2 ~ 14 U/L                              | 0.5 U/L               |             |
| CeGONRs                                  | OPs             | 7.5 → 4.0  | 35 + 15    | 12 ~ 3500 ng/mL                         | 3.43 ng/mL            | 4           |
| NiFe <sub>2</sub> O <sub>4</sub> /NiO    | OPs             | up → 3.8   | 15 + 15    | 5×10 <sup>3</sup> ~ 2.5×10 <sup>3</sup> | 10 <sup>3</sup> ng/mL | 5           |
| MIL-88B(Fe)-NH <sub>2</sub> @GLOX        | Glutamate       | 9.8 → 4.0  | 30         | 1 ~ 100 μM                              | 2.5 μM                | 6           |
| Cu/NC NS                                 | Lactose         | 7.2 → 4.0  | 60 + 10    | 100 ~ 1400 μM                           | 30 μM                 | 7           |
|                                          | β-galactosidase | 7.2 → 4.0  | 60 + 10    | 25 ~ 200 U/L                            | 10 U/L                |             |
| Cu/Fe <sub>3</sub> O <sub>4</sub> @FeOOH | Cholesterol     | 6.5        | 20 + 20    | 10 ~ 400 μM                             | 8.2 μM                | 8           |
| ATP/Fe <sub>3</sub> O <sub>4</sub> NPs   | Glucose         | 7.4        | 30         | 50 ~ 4000 μM                            | 50 μM                 | 9           |
| CuO NPs                                  | ALP             | 9.1 → 7.0  | 30 + 20    | 1.2 ~ 14.4 U/L                          | 0.058 U/L             | 10          |
| <b>Sc<sup>3+</sup>/C-dots</b>            | <b>AChE</b>     | <b>7.4</b> | <b>25</b>  | <b>0.25 ~ 10 U/L</b>                    | <b>0.14 U/L</b>       | <b>This</b> |
|                                          | <b>ALP</b>      | <b>9.5</b> | <b>30</b>  | <b>0 ~ 36 U/L</b>                       | <b>0.35 U/L</b>       | <b>work</b> |
|                                          | <b>OPs</b>      | <b>7.4</b> | <b>35</b>  | <b>0.25 ~ 3 μM</b>                      | <b>0.06 μM</b>        |             |

3

4

5 **Table S2. The tested and recovery analysis of vegetable samples upon Sc<sup>3+</sup>-boosted**  
 6 **photocatalytic oxidation system.**

| Sample  | Content (μM) | Spiked DDV (μM) | Founda) (μM) | Recovery (%) |
|---------|--------------|-----------------|--------------|--------------|
| Tomato  | ND           | 0.50            | 0.54 ± 0.02  | 108          |
|         |              | 1.50            | 1.40 ± 0.03  | 93           |
|         |              | 2.00            | 2.10 ± 0.02  | 105          |
|         |              | 2.50            | 2.60 ± 0.02  | 104          |
| Cabbage | ND           | 0.50            | 0.59 ± 0.02  | 118          |
|         |              | 1.50            | 1.53 ± 0.03  | 102          |
|         |              | 2.00            | 2.10 ± 0.03  | 105          |
|         |              | 2.50            | 2.64 ± 0.03  | 106          |

7 ND means not detected; a) ± means standard deviation (n = 3).

8



## 1 References

- 2 1. S. Zhu, Q. Meng, L. Wang, J. Zhang, Y. Song, H. Jin, K. Zhang, H. Sun, H. Wang and B. Yang, *Angew. Chem. Int. Ed.*, 2013, **52**, 3953-3957.
- 3
- 4 2. Y. Cai, H. Zhu, W. Zhou, Z. Qiu, C. Chen, A. Qileng, K. Li and Y. Liu, *Anal. Chem.*, 2021, **93**, 7275-7282.
- 5 3. T. Han and G. Wang, *J. Mater. Chem. B*, 2019, **7**, 2613-2618.
- 6 4. L. Lin, H. Ma, C. Yang, W. Chen, S. Zeng and Y. Hu, *Mater. Sci.*, 2020, **1**, 2789-2796.
- 7 5. Z. Wei, H. Li, J. Wu, Y. Dong, H. Zhang, H. Chen and C. Ren, *Chin. Chem. Lett.*, 2020, **31**, 177-180.
- 8 6. H. Hu, P. Li, Z. Wang, Y. Du, G. Kuang, Y. Feng, S. Jia and J. Cui, *J. Agr. Food. Chem.*, 2022, **70**,
- 9 3785-3794.
- 10 7. X. Zhou, M. Wang, J. Chen and X. Su, *Talanta*, 2022, **245**, 123451.
- 11 8. Y. Huang, G. Liang, T. Lin, L. Hou, F. Ye and S. Zhao, *Anal. Bioanal. Chem.*, 2019, **411**, 3801-3810.
- 12 9. N. V. S. Vallabani, A. S. Karakoti and S. Singh, *Colloid. Surface. B*, 2017, **153**, 52-60.
- 13 10. Q. Chen, Y. Liu, J. Liu and J. Liu, *Chem. Eur. J.*, 2020, **26**, 16659-16665.
- 14
